# Supplementary material for: Rocking-chair Na-ion hybrid capacitor: a high energy/power system based on Na3V2O2(PO4)2F@PEDOT core–shell nanorods
Source: Royal Society of Chemistry journal article supplement (doi:10.1039/c8ta10051a), 2018-12-07
Supplement: c8ta10051a1.pdf [file c8ta10051a1.pdf]

## Supporting Information

### **Rocking-chair Na-ion hybrid capacitor: a high energy/power system based on $\text{Na}_3\text{V}_2\text{O}_2(\text{PO}_4)_2\text{F}$ @PEDOT core-shell nanorods**

Langyuan Wu,<sup>a</sup> Shengyang Dong,<sup>a</sup> Gang Pang,<sup>b</sup> Hongsen Li,<sup>a</sup> Chengyang Xu,<sup>a</sup> Yadi Zhang,<sup>a</sup> Hui Dou<sup>a</sup> and Xiaogang Zhang,<sup>\*a</sup>

*<sup>a</sup>Jiangsu Key Laboratory of Electrochemical Energy Storage Technologies, College of Materials Science and Engineering, Nanjing University of Aeronautics and Astronautics, Nanjing, 210016, P.R. China*

*<sup>b</sup>School of Material Science & Engineering and Anhui Key Laboratory of Metal Materials and Processing, Anhui University of Technology, Maanshan, 243002, P. R. China*

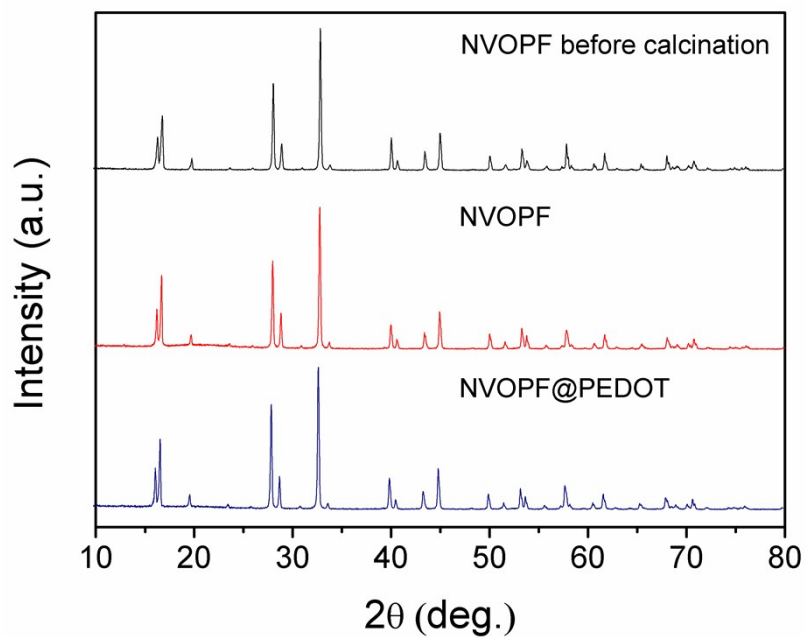

**Fig. S1** Comparison of the XRD patterns of Na<sub>3</sub>V<sub>2</sub>O<sub>2</sub>(PO<sub>4</sub>)<sub>2</sub>F before calcination, Na<sub>3</sub>V<sub>2</sub>O<sub>2</sub>(PO<sub>4</sub>)<sub>2</sub>F and Na<sub>3</sub>V<sub>2</sub>O<sub>2</sub>(PO<sub>4</sub>)<sub>2</sub>F@PEDOT.

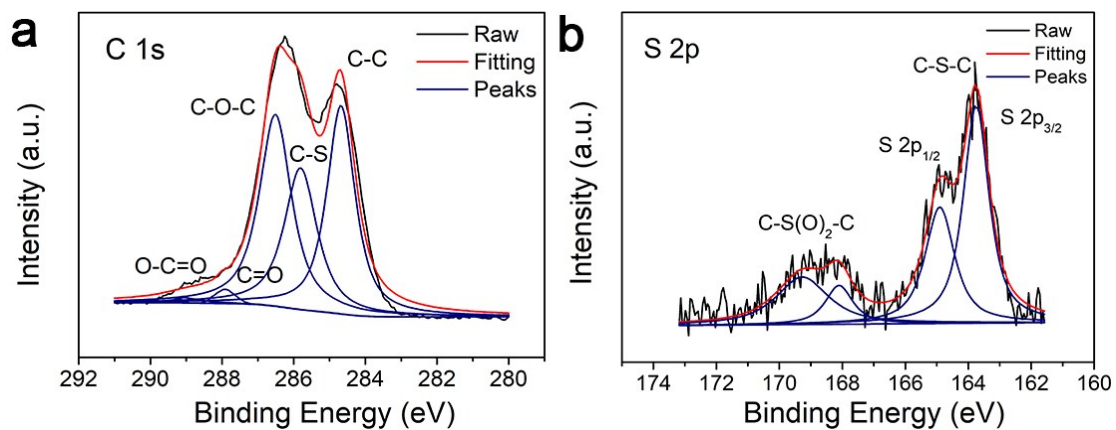

**Fig. S2** XPS (a) C 1s (b) S 2p spectra of Na<sub>3</sub>V<sub>2</sub>O<sub>2</sub>(PO<sub>4</sub>)<sub>2</sub>F@PEDOT.

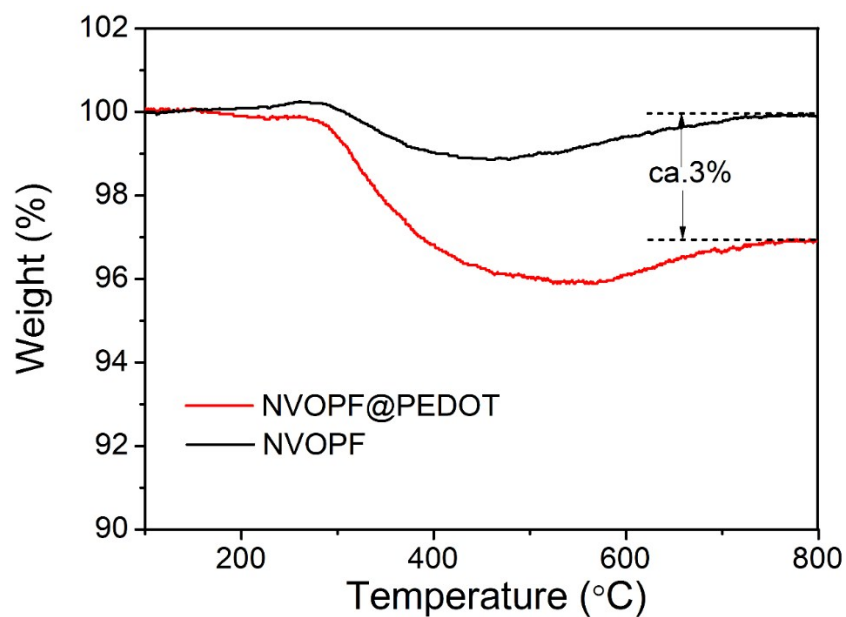

**Fig. S3** TG curves of NVOPF and NVOPF@PEDOT.

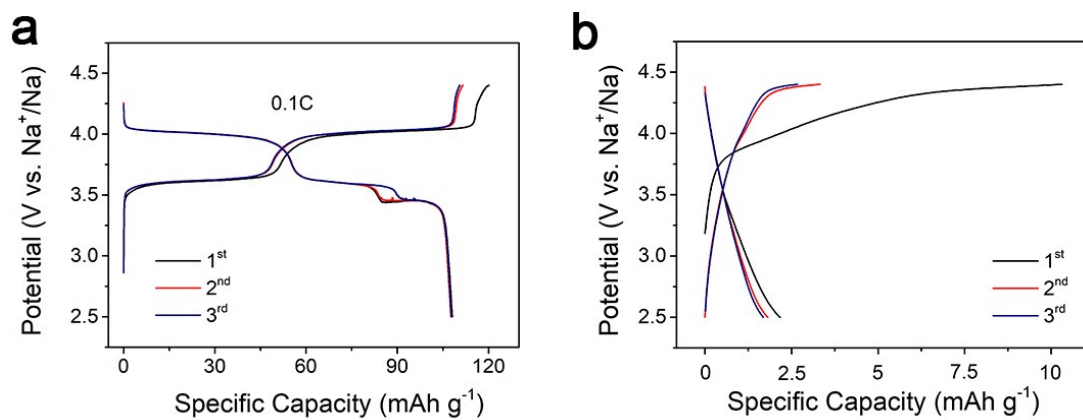

**Fig. S4** (a) GCD curves of NVOPF and (b) PEDOT in 1 M NaClO<sub>4</sub> in EC/PC (1:1 in v/v) with 5 vol % FEC as the additive.

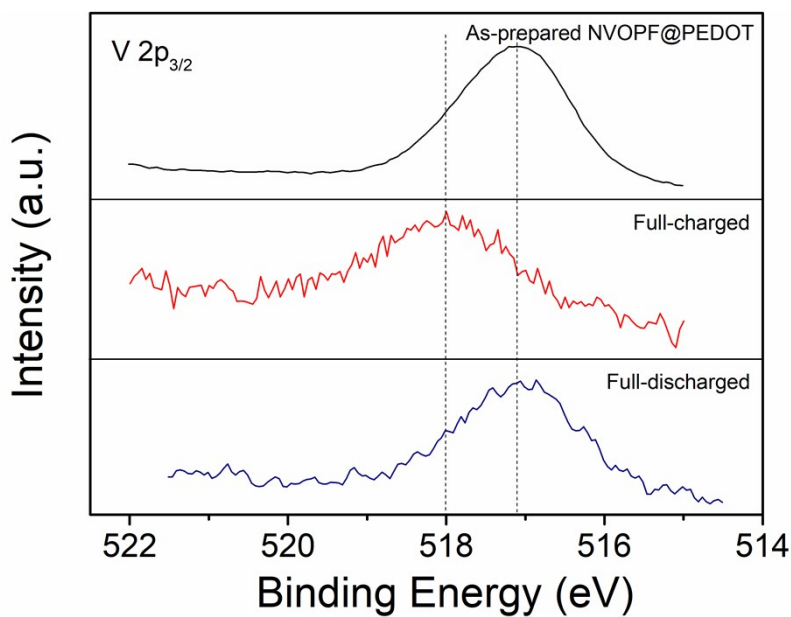

**Fig. S5** XPS V 2p<sub>3/2</sub> spectra of NVOPF@PEDOT at different SOC.

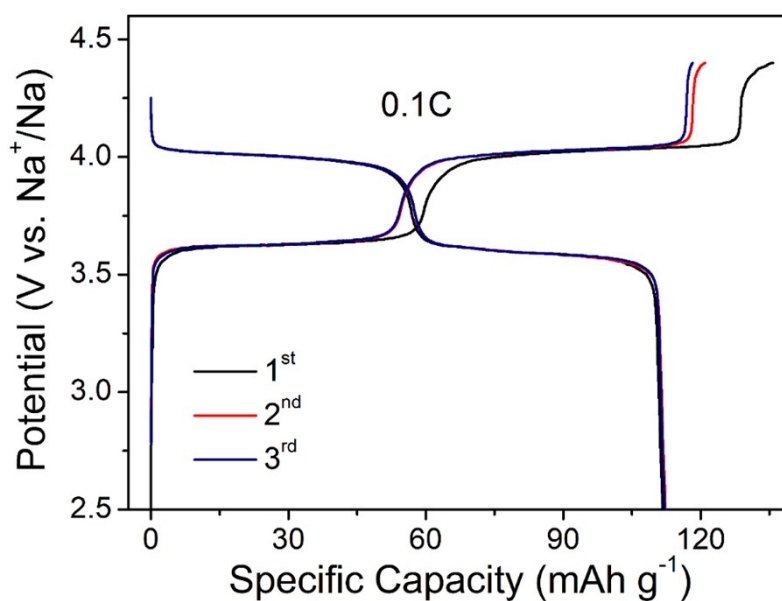

**Fig. S6** GCD curves of NVOPF@PEDOT in 1 M NaClO<sub>4</sub> in EC/PC (1:1 in v/v).

J. M. Tarascon *et al.* reported that two major effects regarding the addition of FEC in Na half-cells emerge. One regards the enhanced efficiency of the cathode's first cycle by lowering the irreversible capacity and the other one deals with increase polarization

penalty generated in two-electrode configuration. Some resistive layer grows at OCV on a half-cell with Na counter electrode before testing starts which limits the mass transfer from the counter electrode to the electrolyte<sup>1</sup>.

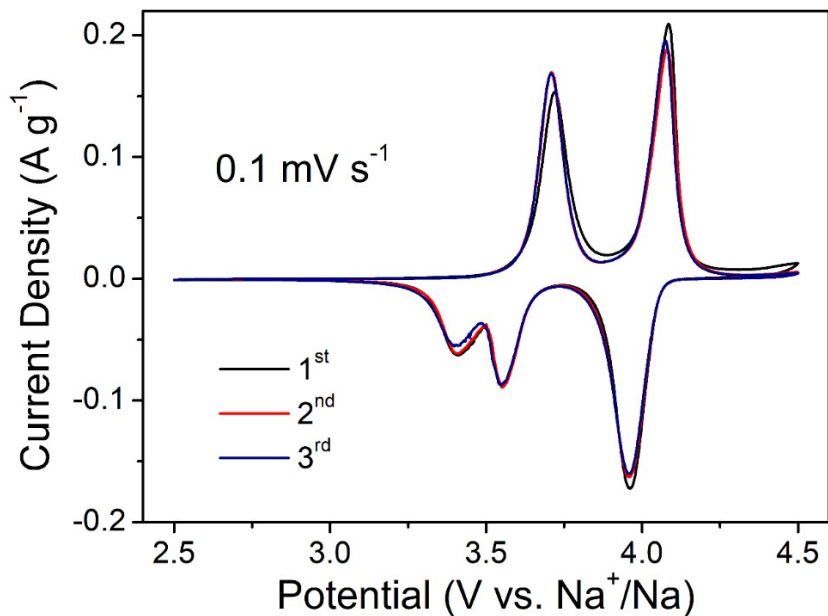

**Fig. S7** CV curves of NVOPF@PEDOT.

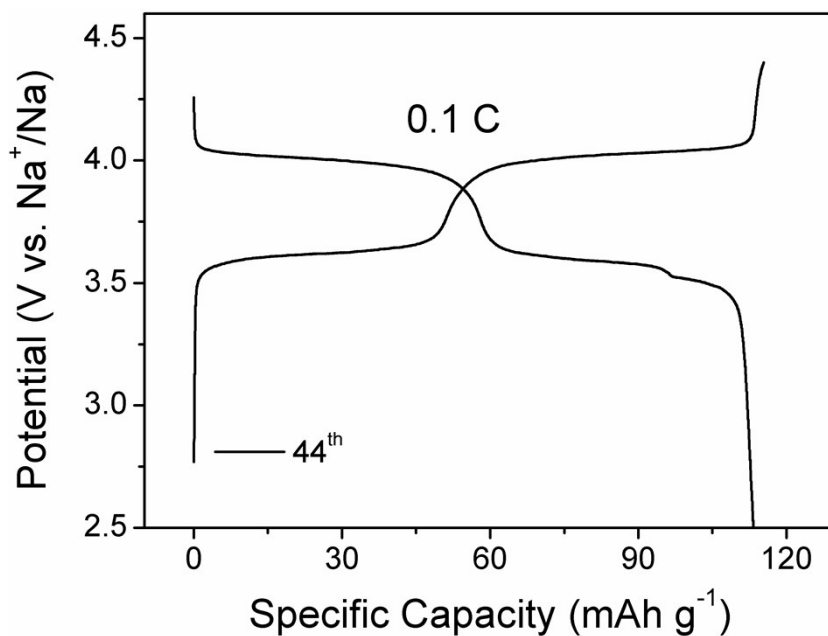

**Fig. S8** The 44<sup>th</sup> cycle of GCD curves of NVOPF@PEDOT in rate test.

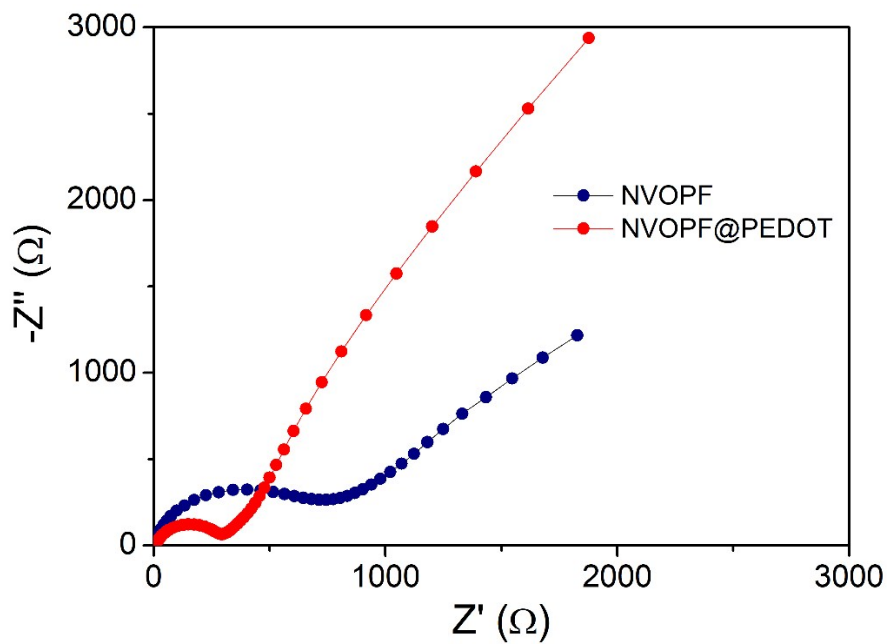

**Fig. S9** EIS of NVOPF and NVOPF@PEDOT electrodes.

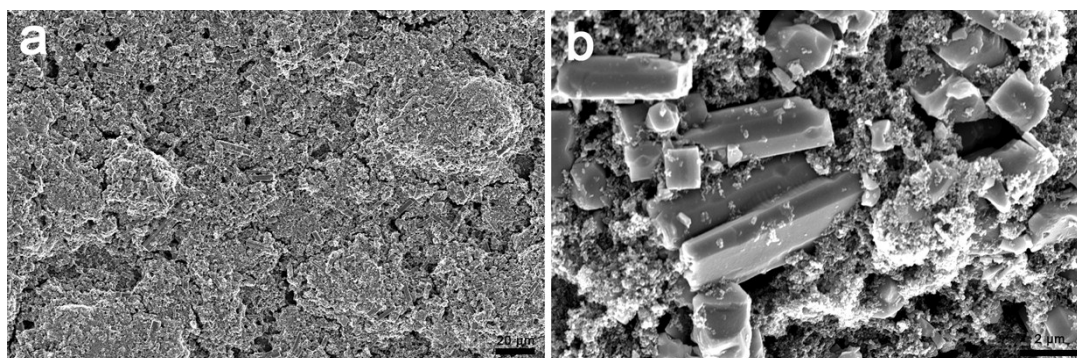

**Fig. S10** Different magnification SEM images of the NVOPF@PEDOT electrode after 20 cycle at 1C.

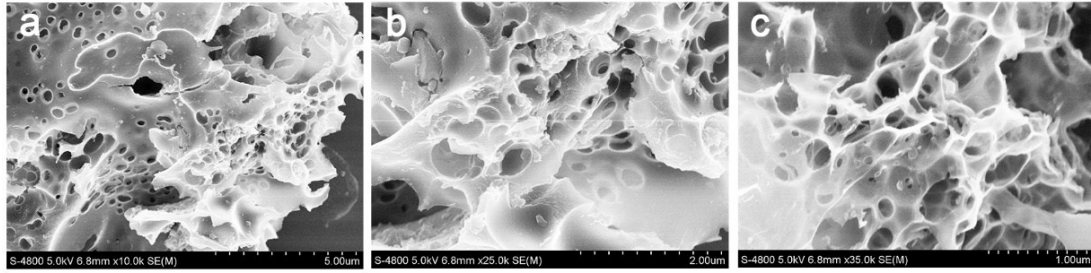

**Fig. S11** SEM images of peanut shell derived carbon.

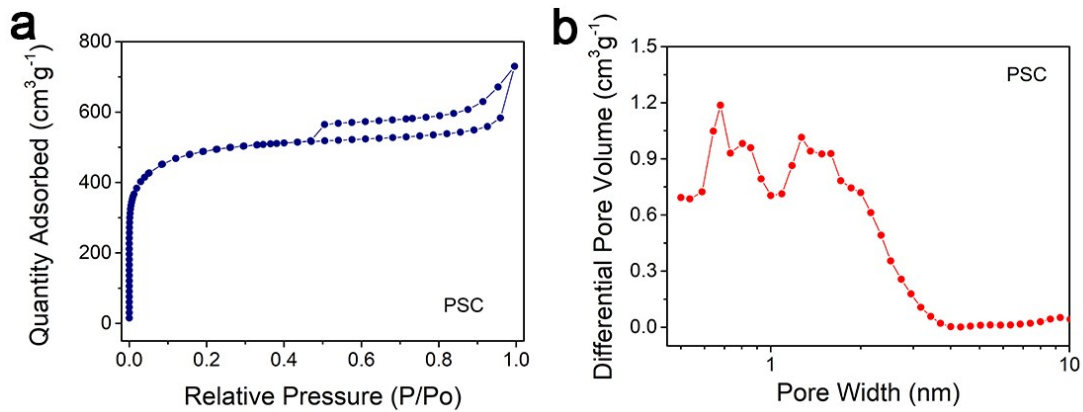

**Fig. S12** (a) Nitrogen adsorption–desorption isotherm of peanut shell derived carbon. (b) Pore size distribution of peanut shell derived carbon.

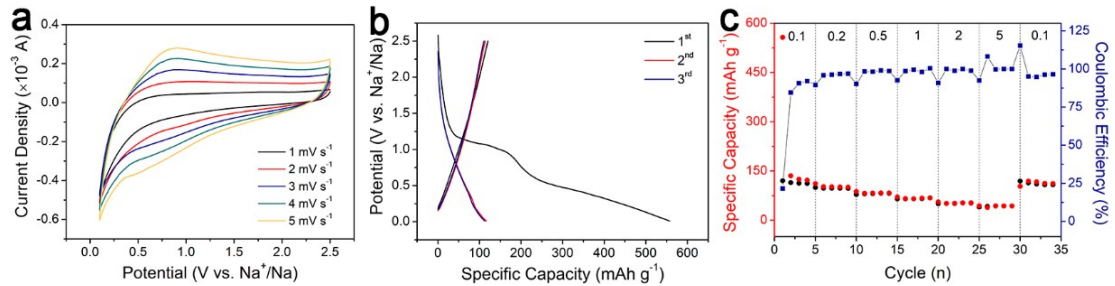

**Fig. S13** (a-c) Electrochemical properties of AC (peanut shell derived carbon) in half cells: (a) CV curves at various scan rates from 1.0 to 5.0  $\text{mV s}^{-1}$ . (b) GCD curves of the AC at 0.1  $\text{A g}^{-1}$ . (c) Rate capabilities of AC at various current rates from 0.1  $\text{A g}^{-1}$  to 5  $\text{A g}^{-1}$ .



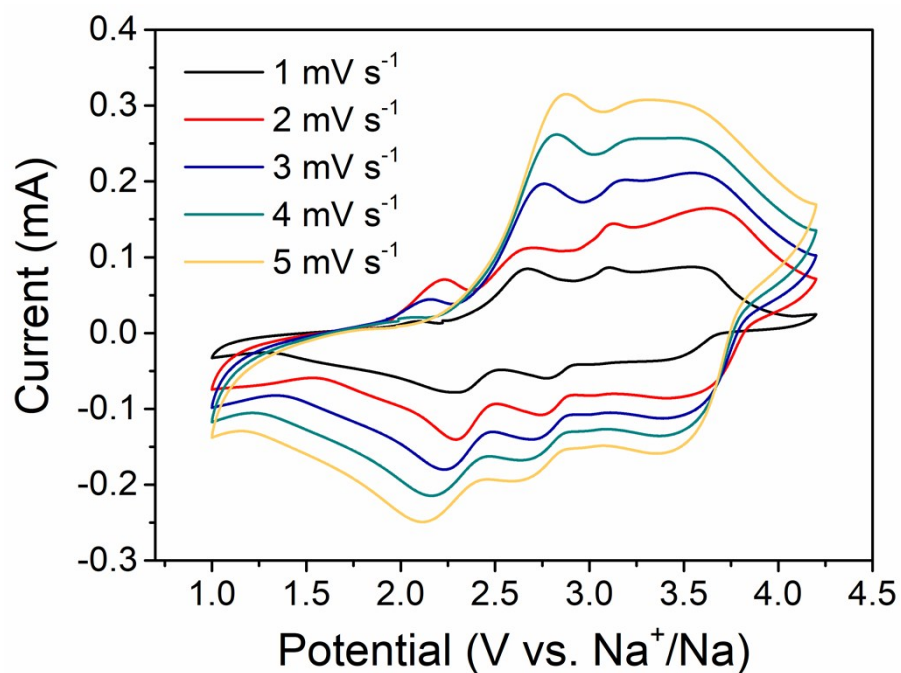

**Fig. S14** CV curves at various scan rates from 1.0 to 5.0  $\text{mV s}^{-1}$  of NVOPF@PEDOT//AC.

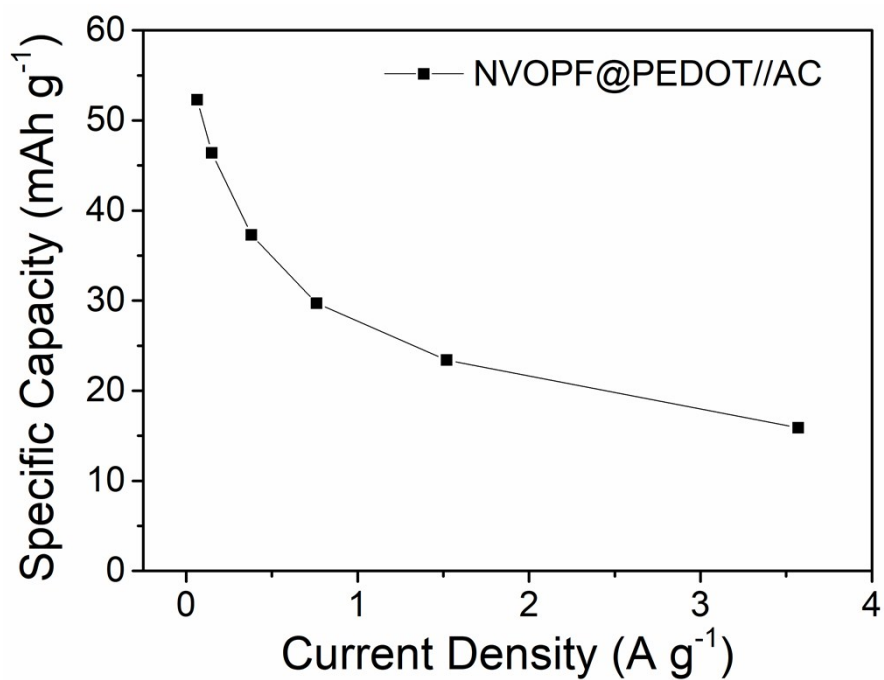

**Fig. S15** Specific capacity of NVOPF@PEDOT//AC at different current density.



**Table S1** The sodium storage properties for reported NVOFP half cells.

|                                                                                                                               | Electrolyte                                               | Rate capability<br>(mA h g <sup>-1</sup> ) | Cycle life<br>(corresponded capacity retention) |
|-------------------------------------------------------------------------------------------------------------------------------|-----------------------------------------------------------|--------------------------------------------|-------------------------------------------------|
| Na <sub>3</sub> V <sub>2</sub> O <sub>2</sub> (PO <sub>4</sub> ) <sub>2</sub> F@PEDOT<br>(present work)                       | 1M NaClO <sub>4</sub> in<br>EC:PC+5%FEC                   | 73 at 10C                                  | 8000 at 5C<br>(83.8%)                           |
| Na <sub>3</sub> V <sub>2</sub> O <sub>2</sub> (PO <sub>4</sub> ) <sub>2</sub> F@carbon/graphene <sup>2</sup>                  | 1M NaClO <sub>4</sub> in<br>EC:DMC                        | 78.5 at<br>10C                             | 40 at 1C<br>(98.9%)                             |
| Na <sub>3</sub> V <sub>2</sub> O <sub>2</sub> (PO <sub>4</sub> ) <sub>2</sub> F/C <sup>3</sup>                                | 1 M NaPF <sub>6</sub> in<br>EC:PC                         | 30 at 5C                                   |                                                 |
| Na <sub>3</sub> V <sub>2</sub> O <sub>2</sub> (PO <sub>4</sub> ) <sub>2</sub> F-nano-tetraprisms <sup>4</sup>                 | 1M NaClO <sub>4</sub> in<br>PC+5%FEC in<br>the P(VDF-HFP) | 81 at 10C                                  | 1500 at 1C<br>(94.6%)                           |
| Na <sub>3</sub> V <sub>2</sub> O <sub>2</sub> (PO <sub>4</sub> ) <sub>2</sub> F/graphene <sup>5</sup>                         | 1 M NaPF <sub>6</sub> in<br>EC:DEC                        | 40 at 10C                                  | 200 at 0.1C<br>(91.4%)                          |
| Na <sub>3</sub> (VO <sub>1-x</sub> PO <sub>4</sub> ) <sub>2</sub> F <sub>1+2x</sub> (0 ≤ x ≤ 1)<br>nanoparticles <sup>6</sup> | 1M NaClO <sub>4</sub> in<br>EC:DEC+2%FEC                  | 73 at 10C                                  | 1200 at 2C<br>(90%)                             |

## Reference:

- 1 R. Dugas, A. Ponrouch, G. Gachot, R. David, M.R. Palacin, J.M. Tarascon, *J. Electrochem. Soc.* 2016, **163**, A2333.
- 2 H. Jin, J. Dong, E. Uchaker, Q. Zhang, X. Zhou, S. Hou, J. Li, G. Cao, *J. Mater. Chem. A* 2015, **3**, 17563.
- 3 P. Serras, V. Palomares, P. Kubiak, L. Lezama, T. Rojo, *Electrochem. Commun.* 2013, **34**, 344.
- 4 J.-Z. Guo, A.-B. Yang, Z.-Y. Gu, X.-L. Wu, W.-L. Pang, Q.-L. Ning, W.-H. Li, J.-P. Zhang, Z.-M. Su, *ACS Appl. Mater. Interfaces* 2018, **10**, 17903.
- 5 M. Xu, L. Wang, X. Zhao, J. Song, H. Xie, Y. Lu, J.B. Goodenough, *Phys. Chem. Chem. Phys.* 2013, **15**, 13032.
- 6 Y. Qi, L. Mu, J. Zhao, Y.-S. Hu, H. Liu, S. Dai, *Angew. Chem. Int. Ed.* 2015, **54**, 9911.
